# Supplementary material
Source: publisher figshare collection journal article supplement (https://acs.figshare.com/ndownloader/files/9120046)
Supplement: Supplementary file 1 [file 9120046]

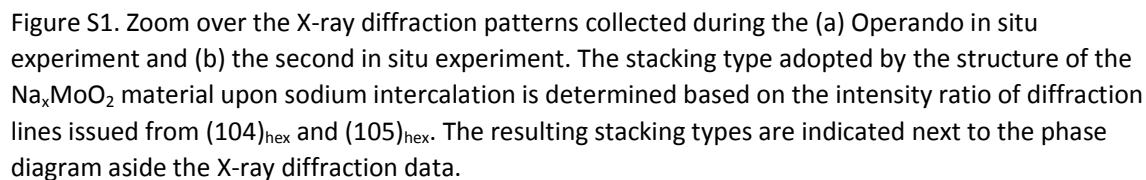

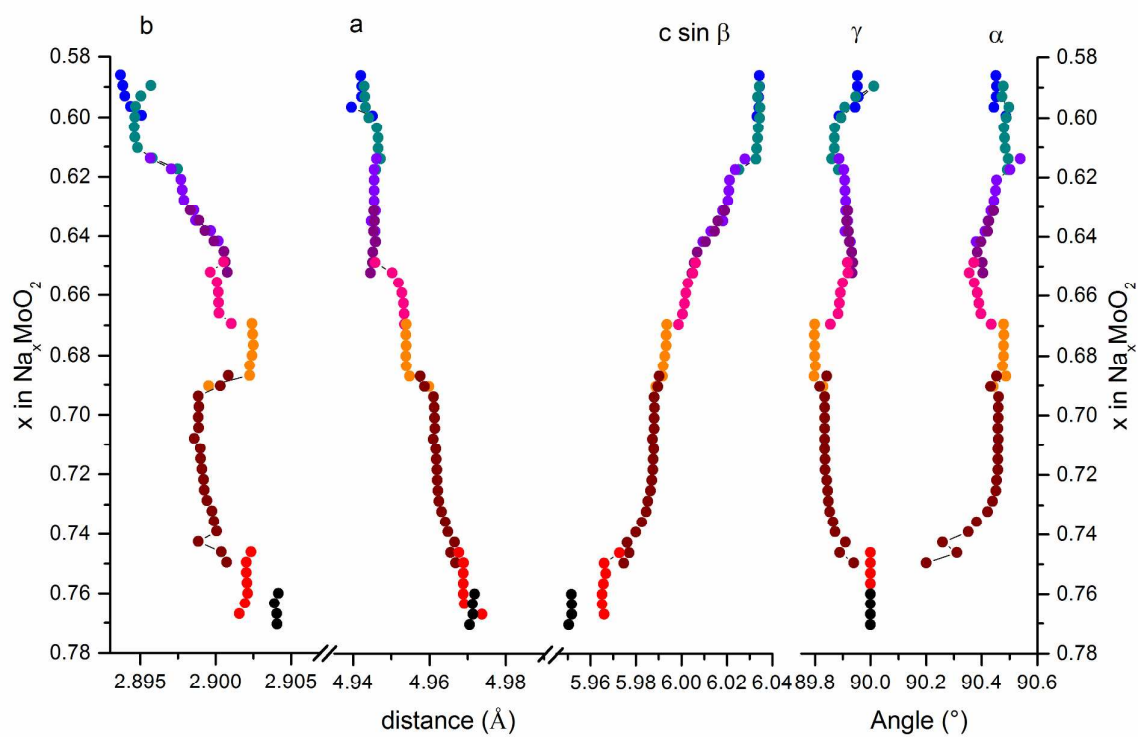

Figure S2. Evolution of the cell parameters of the  $\text{Na}_x\text{MoO}_2$  phases upon sodium intercalation.
